# Supplementary material for: Genomic Evidence for Simultaneous Optimization of Transcription and Translation through Codon Variants in the pmoCAB Operon of Type Ia Methanotrophs
Source: PubMed Central journal article supplement (PMC6650546; doi:10.1128/msystems.00342-19), 2019-07-23

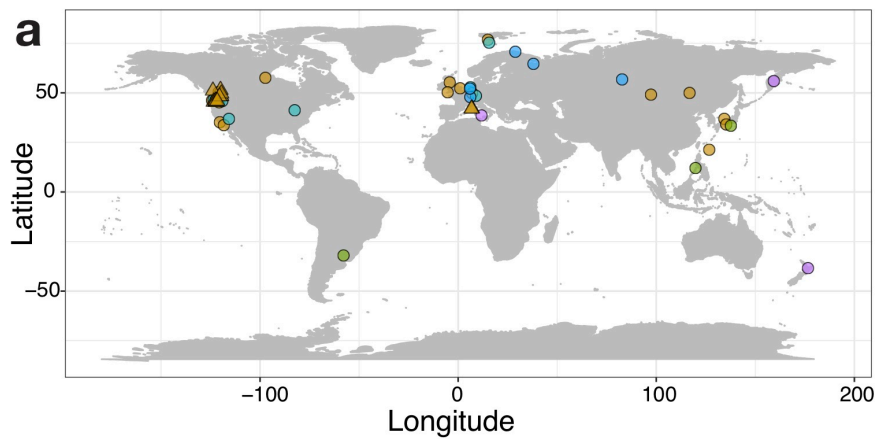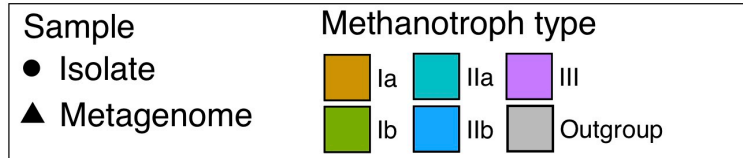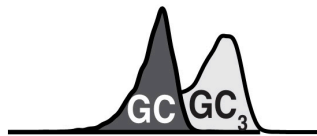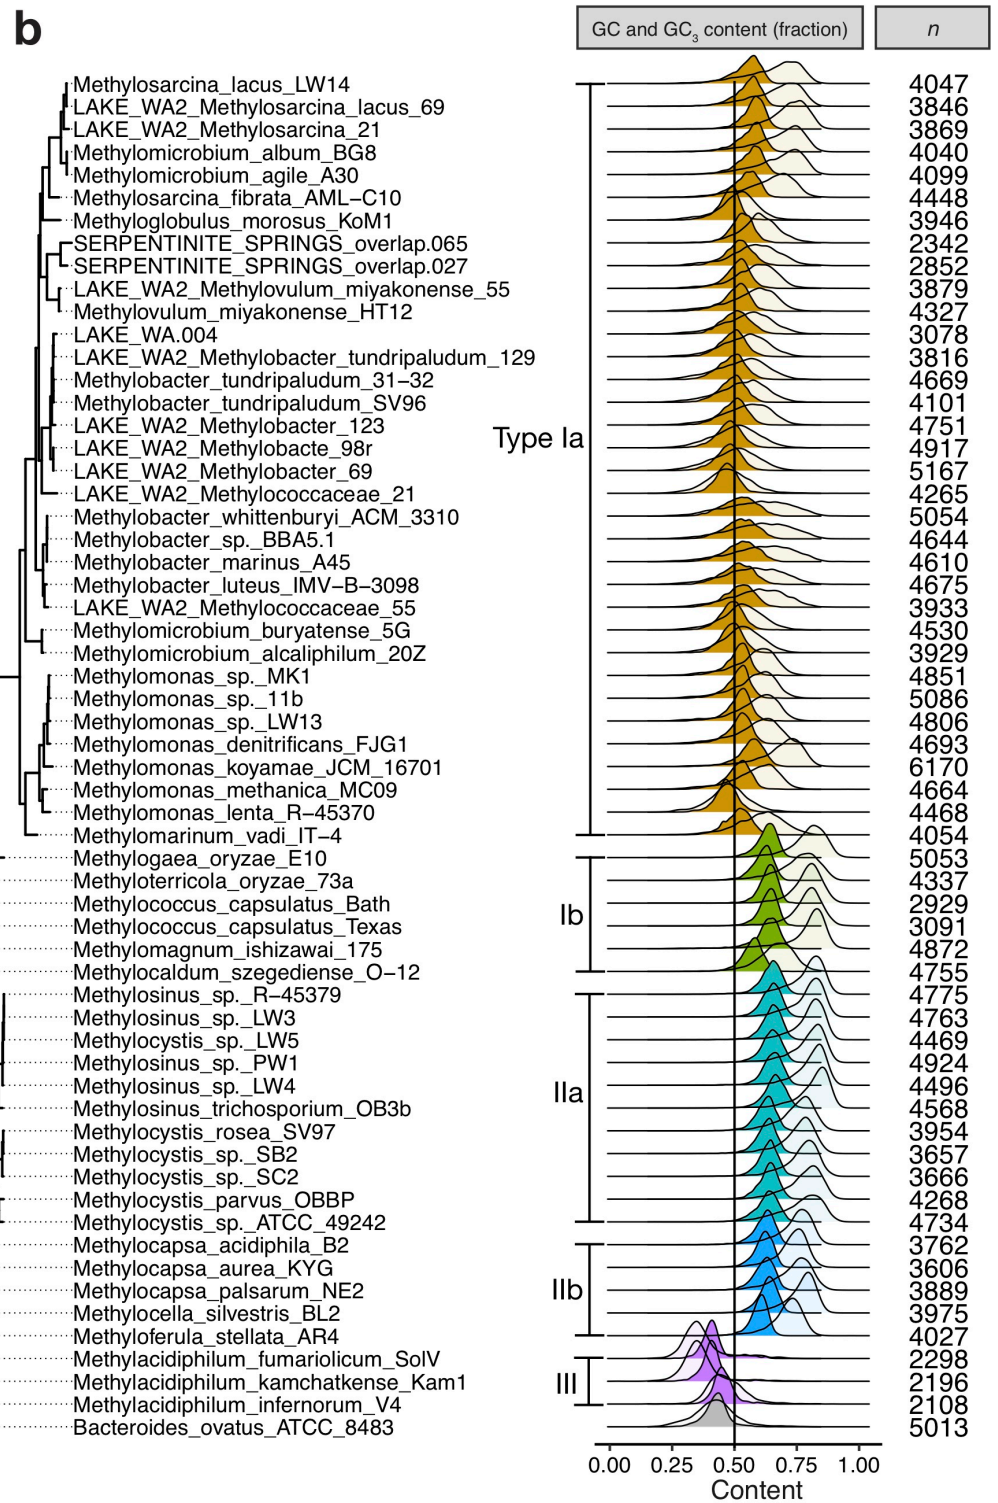

**C**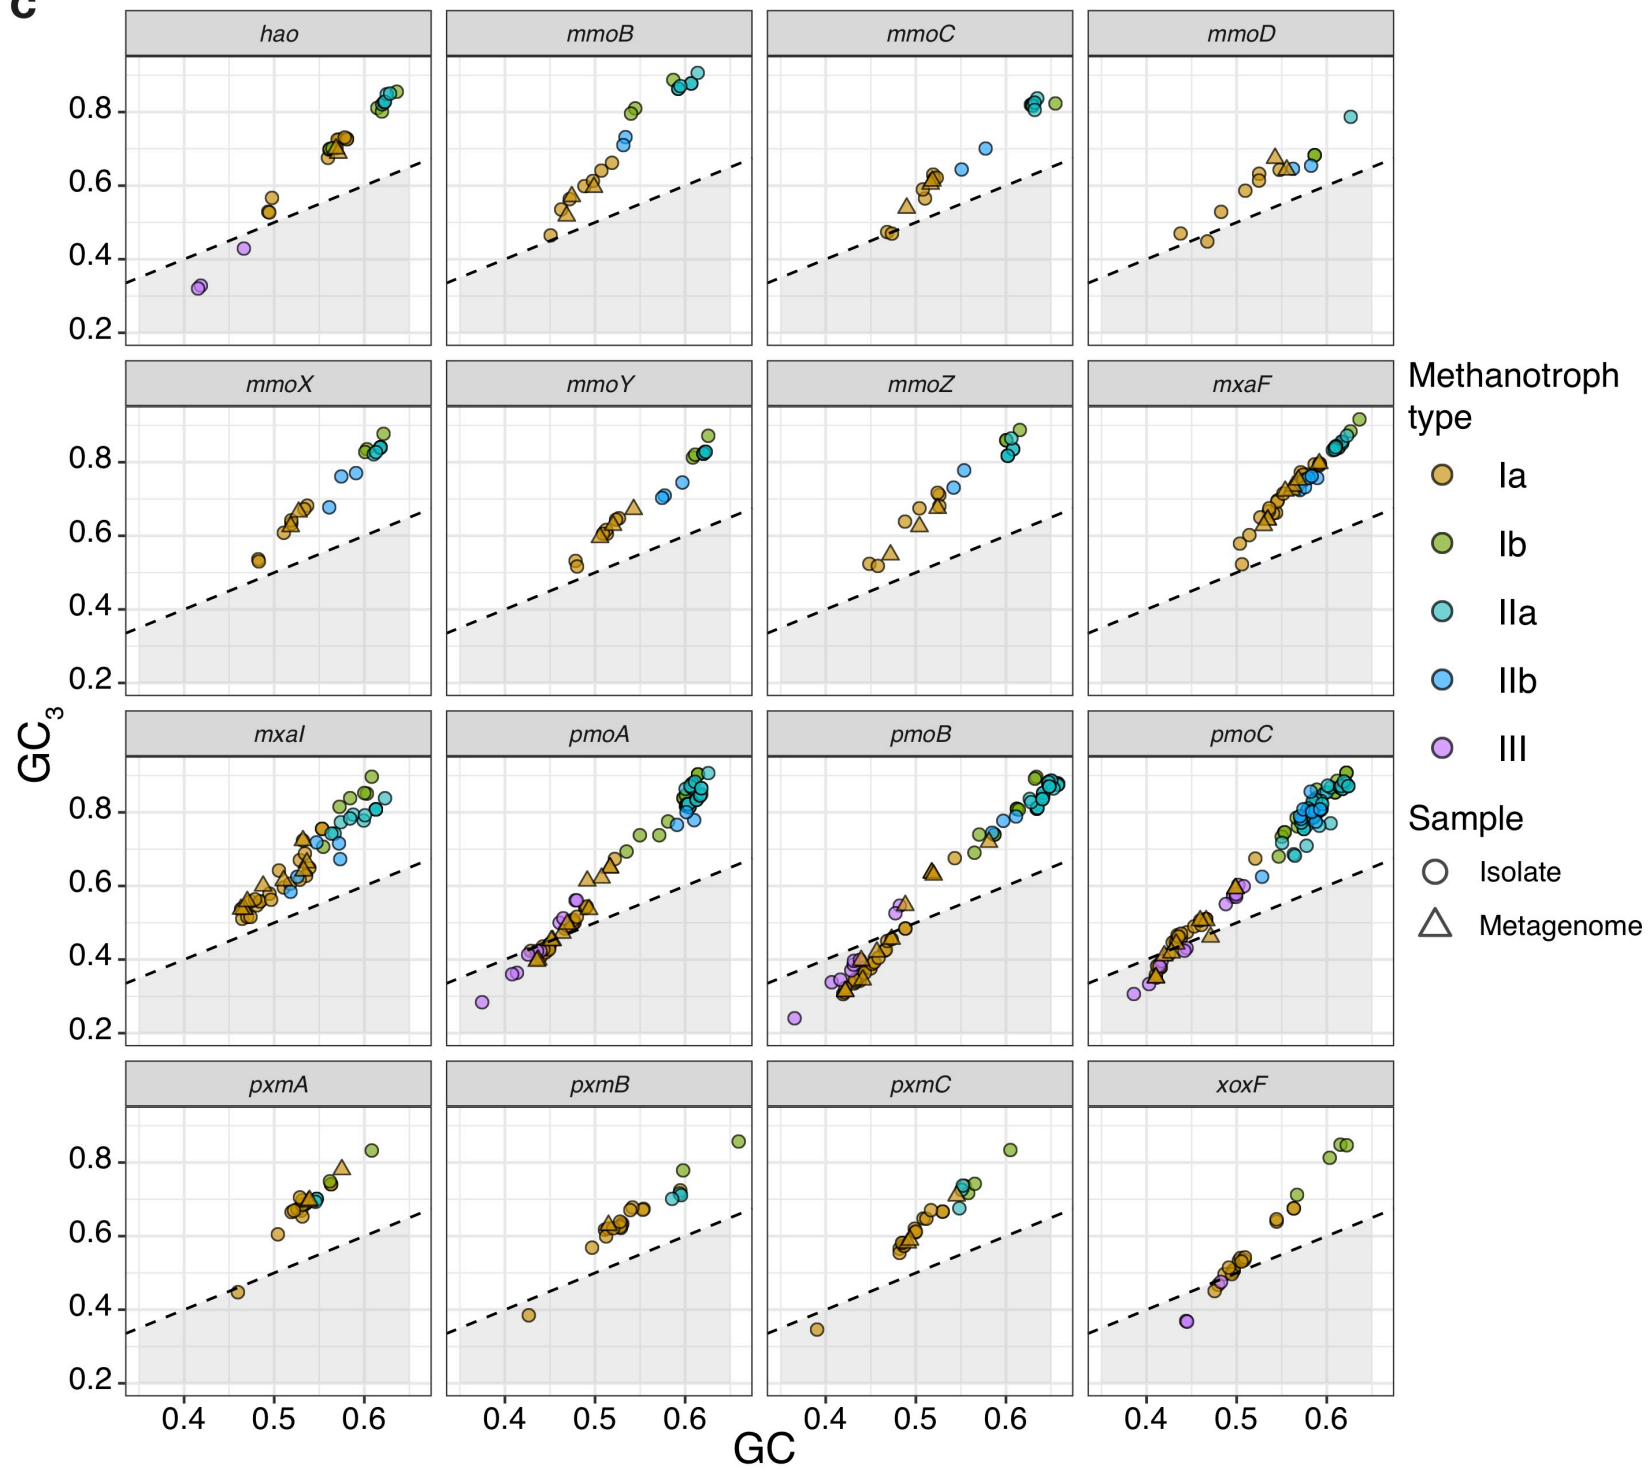

Supplement: mSystems.00342-19-sf001.pdf [file mSystems.00342-19-sf001.pdf]
