# Supplementary material for: Genomic Evidence for Simultaneous Optimization of Transcription and Translation through Codon Variants in the pmoCAB Operon of Type Ia Methanotrophs
Source: PubMed Central journal article supplement (PMC6650546; doi:10.1128/msystems.00342-19), 2019-07-23

*Methylobacter tundripaludum* 31/32

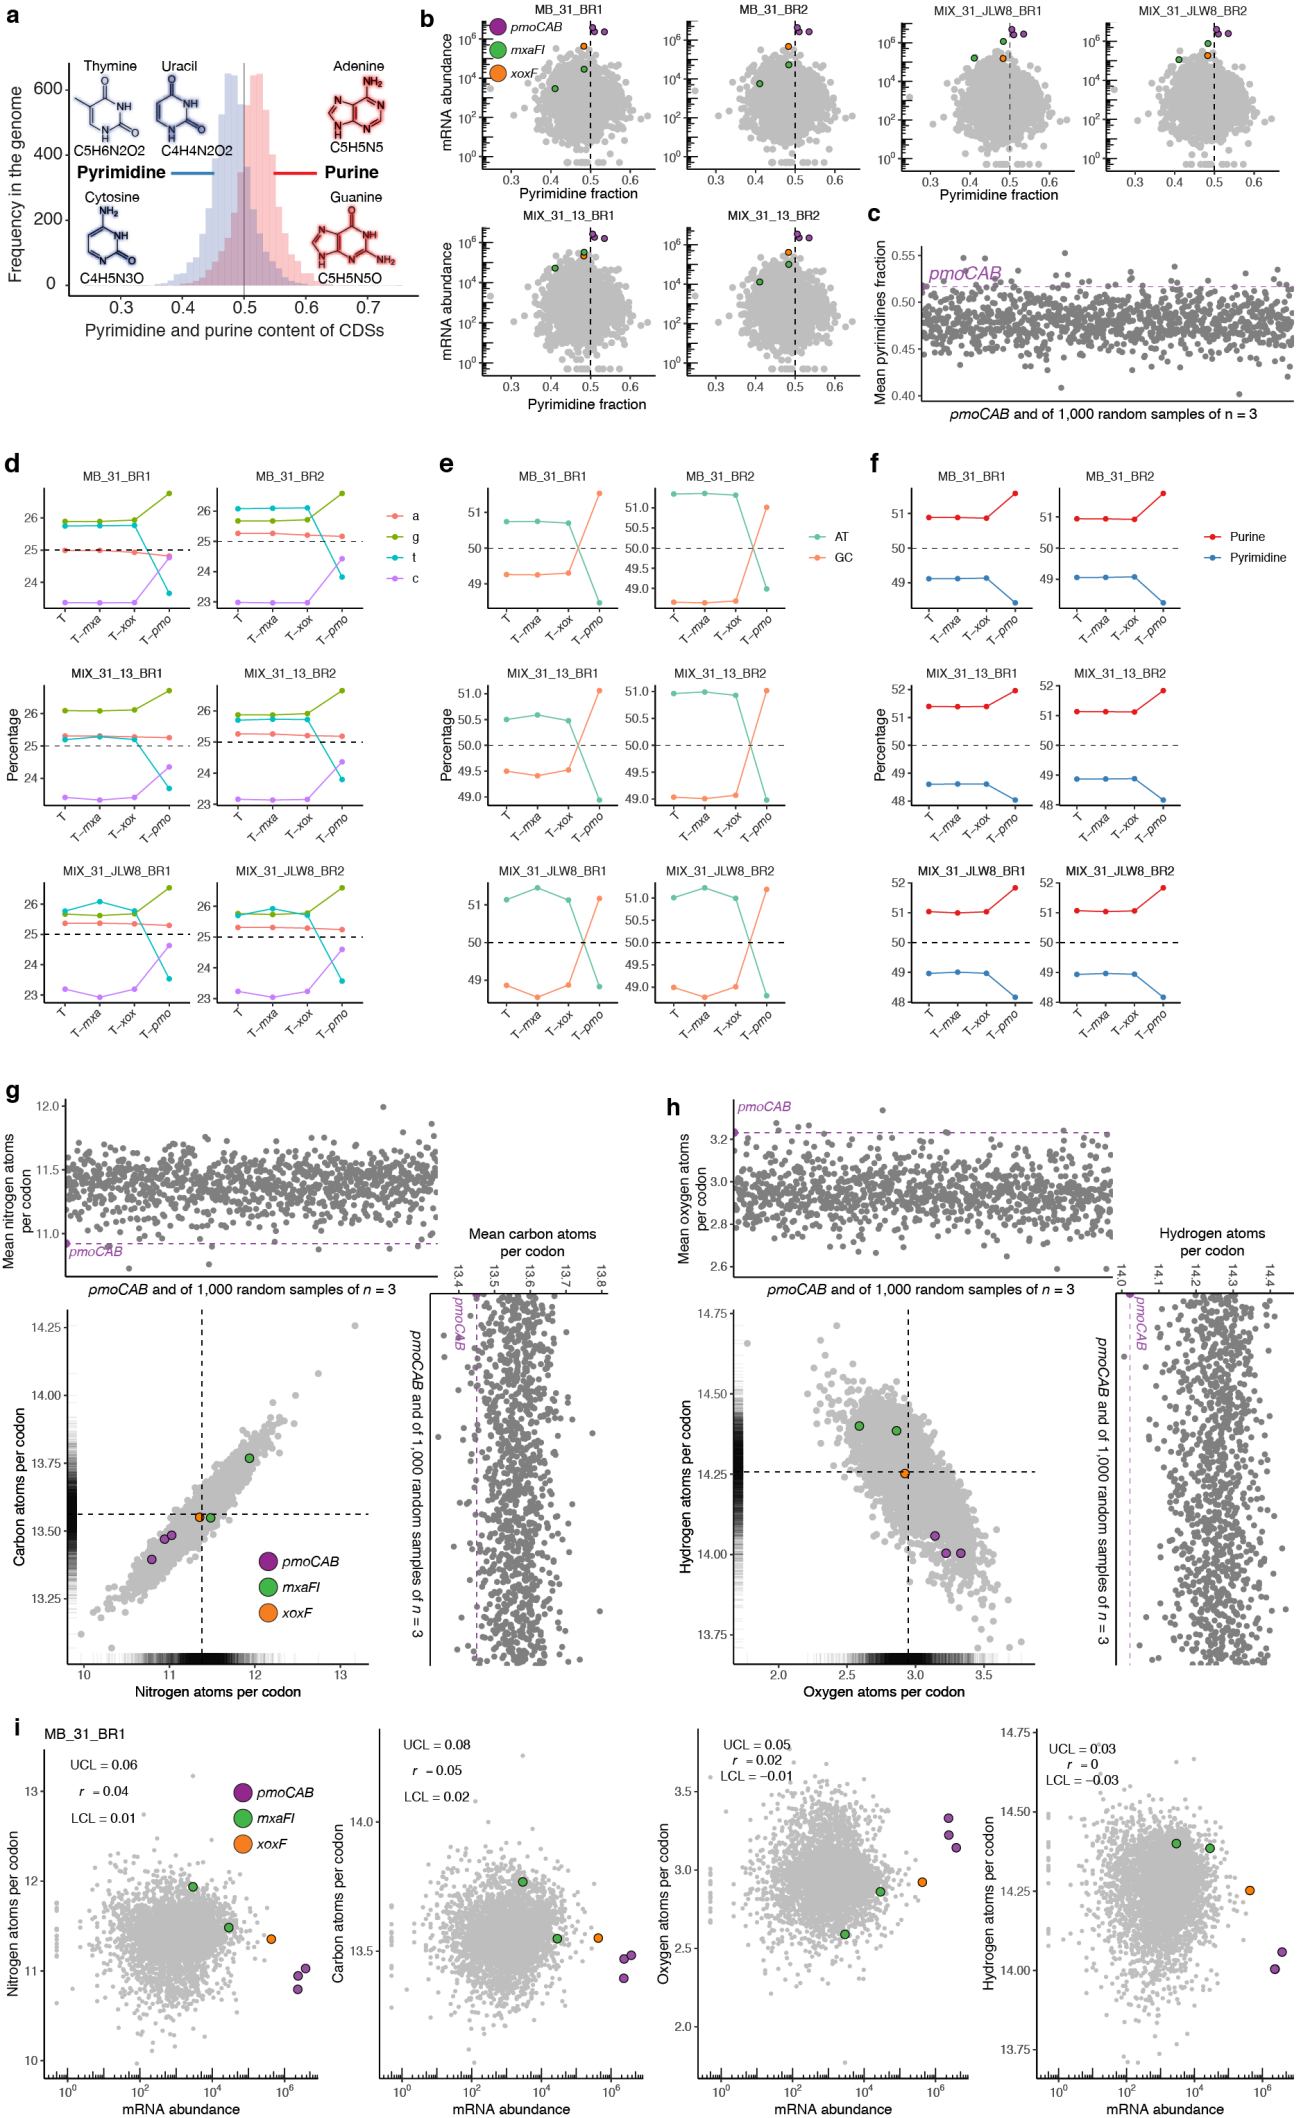

*Methylomicrobium alcaliphilum* 20Z

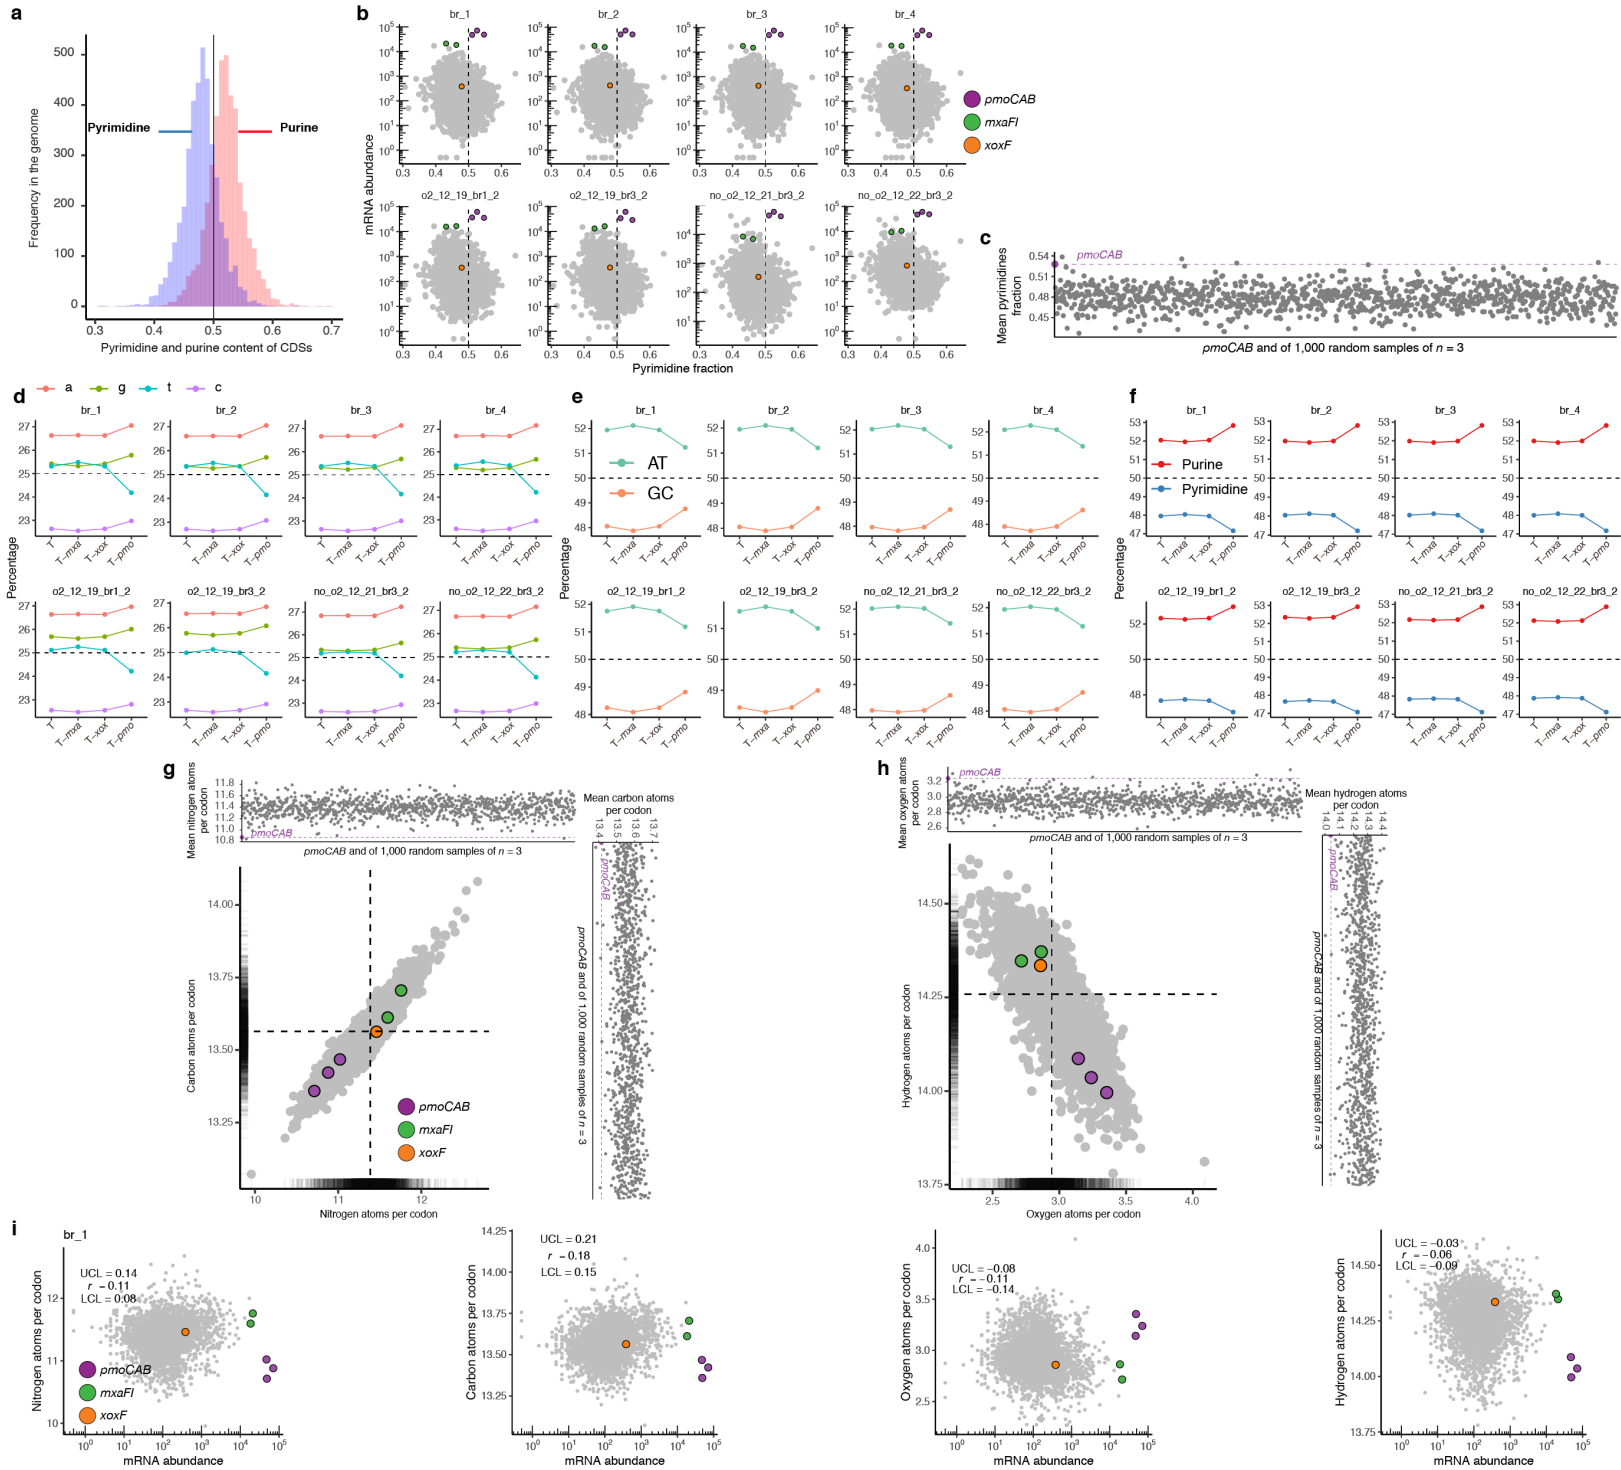

# Methylobacterium buryatense 5G

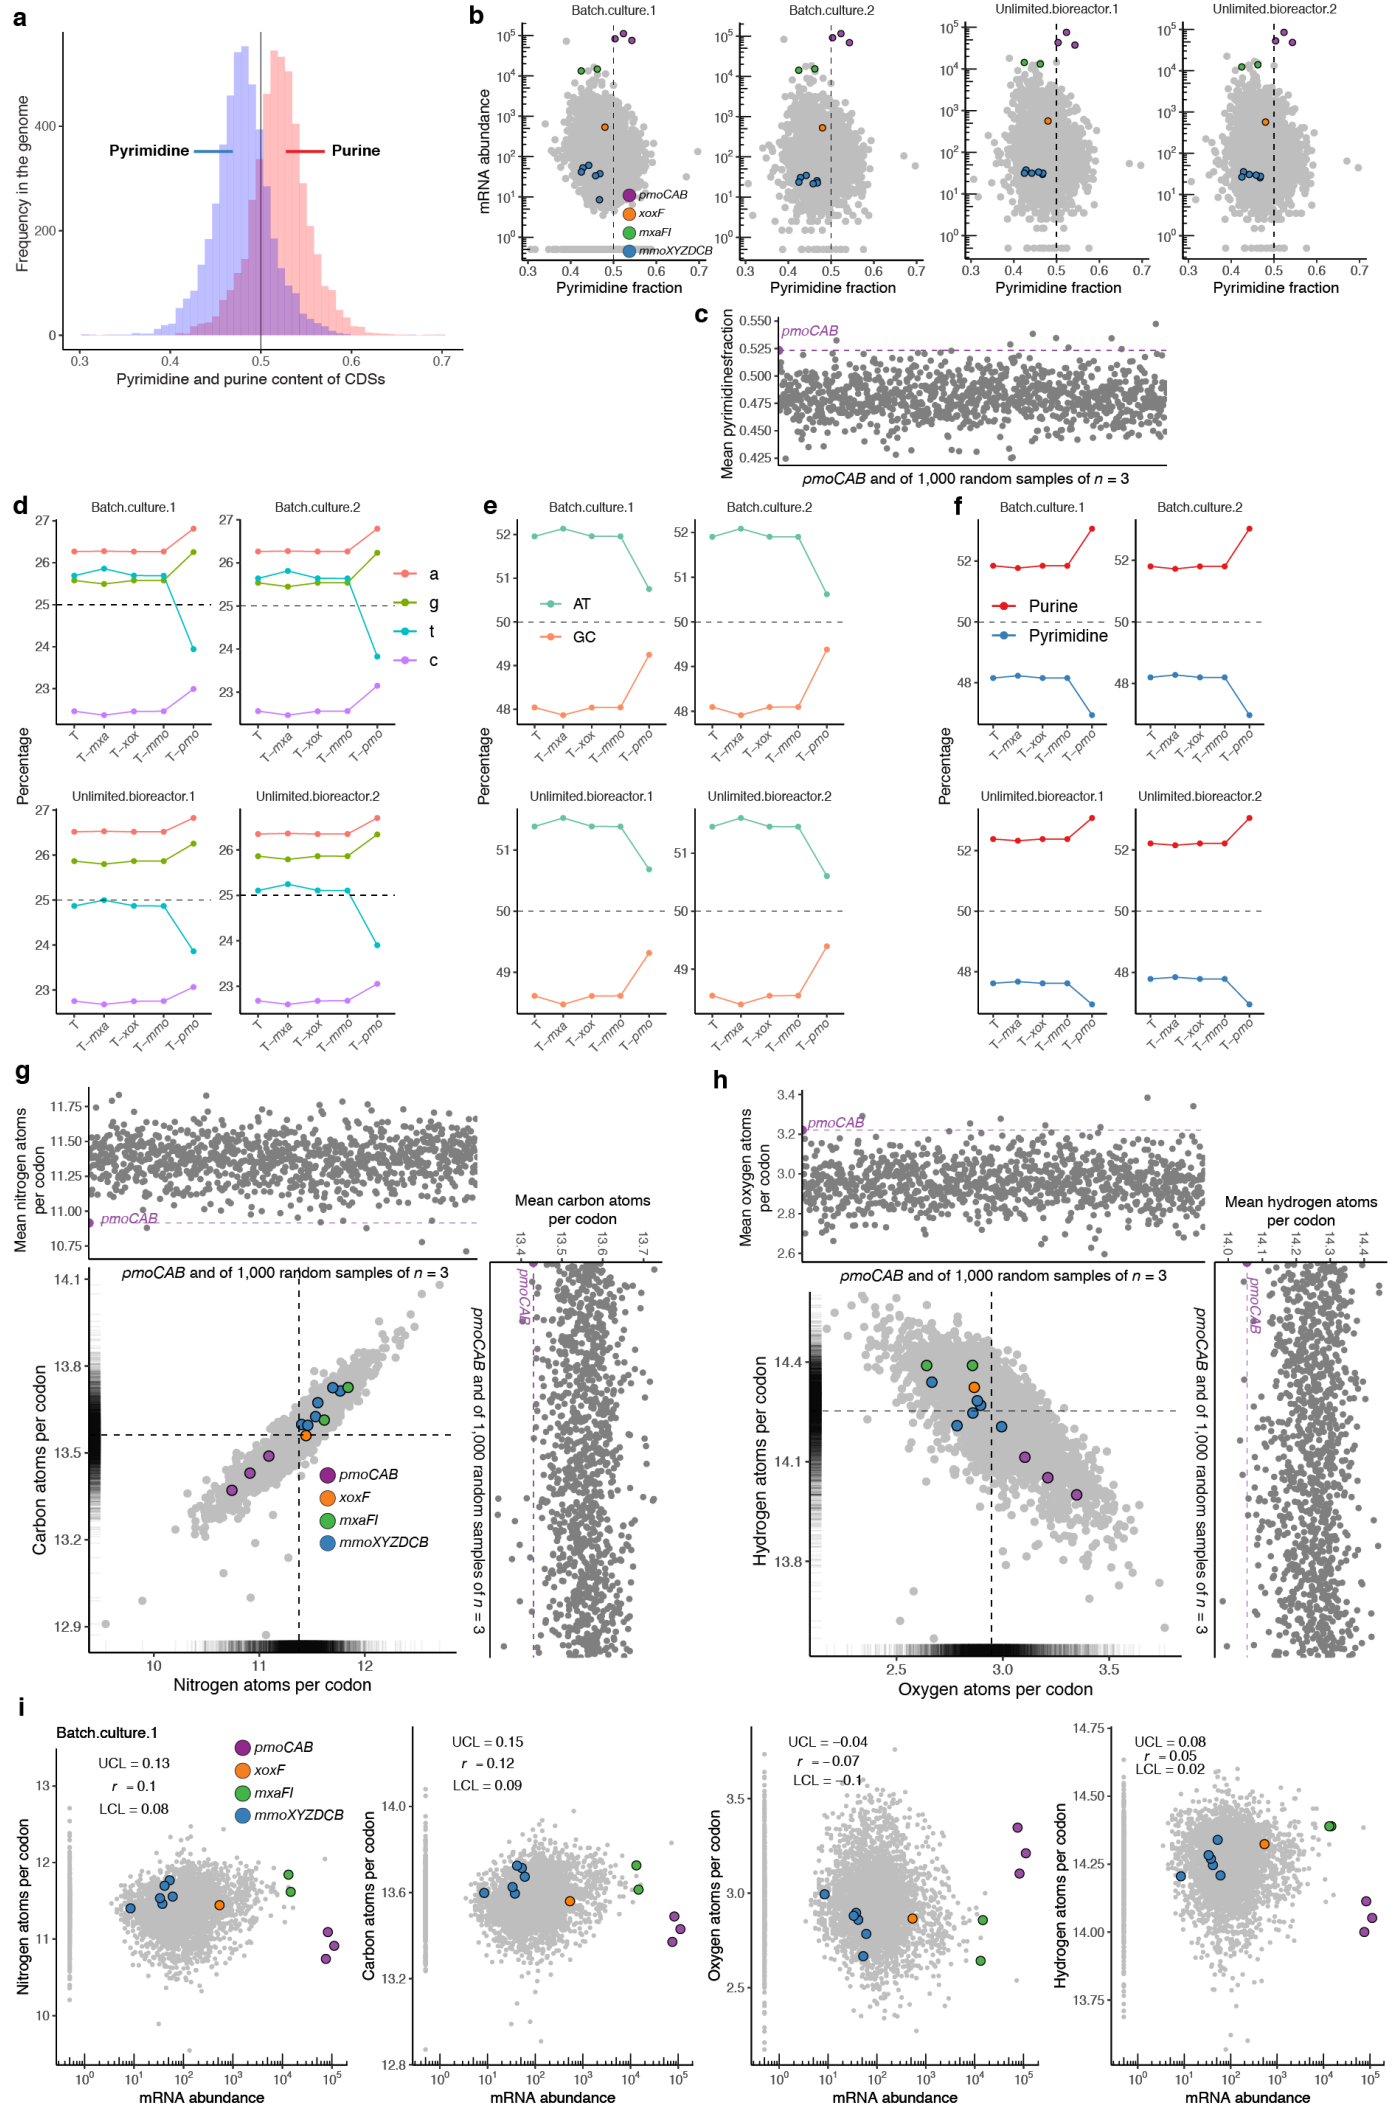

Supplement: mSystems.00342-19-sf006.pdf [file mSystems.00342-19-sf006.pdf]
